# Supplementary material
Source: PubMed Central journal article supplement (PMC6306100)
Supplement: ahdb-11-334-s1.pdf [file ahdb-11-334-s1.pdf]

## **Appendix**

### **Economic Burden of Adverse Events Associated with Immunotherapy and Targeted Therapy for Metastatic Melanoma in the Elderly**

Sameer R. Ghate, PhD; Zhiyi Li, MBA, MA; Jackson Tang, MSc; Antonio Reis Nakasato, MD

This Appendix has not been edited and is provided as supplemental materials for this article, which was published in *American Health & Drug Benefits* in October 2018.

**TABLE.** Sample selection flow chart

|                                                                                                                                                                | <b>N</b> |
|----------------------------------------------------------------------------------------------------------------------------------------------------------------|----------|
| Patients with at least one diagnosis of malignant melanoma (ICD-9 172.0–9) between January 1, 2011 and December 31, 2014                                       | 146,525  |
| Diagnosis of metastasis (ICD-9 196.xx, 197.xx, 198.xx, 199.xx) within 30 days before or 60 days after the malignant melanoma diagnosis                         | 19,118   |
| At least one pharmacy or medical claim for a study drug (ipilimumab, pembrolizumab, dabrafenib, trametinib, vemurafenib, or dabrafenib/trametinib combination) | 4,739    |
| No more than one study drug prescribed on the index date                                                                                                       | 4,695    |
| No diagnosis of non-melanoma primary malignancy during the 6-month baseline period                                                                             | 1,336    |
| No pregnancy during the study period                                                                                                                           | 1,336    |

|                                                                         |     |
|-------------------------------------------------------------------------|-----|
| Continuous enrollment for 6-months pre- and 3 months<br>post-index date | 844 |
|-------------------------------------------------------------------------|-----|

**FIGURE.** Patient distribution by drug therapy

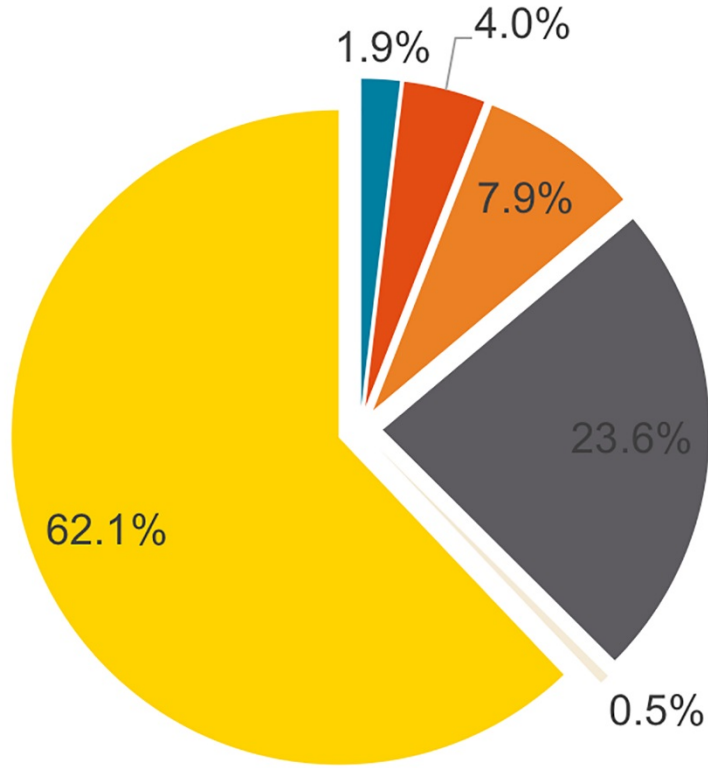

|                                            |
|--------------------------------------------|
| ■ Trametinib (n=16)                        |
| ■ Dabrafenib (n=34)                        |
| ■ Dabrafenib/trametinib combination (n=67) |
| ■ Vemurafenib (n=199)                      |

Targeted  
therapy  
N=316

|                       |
|-----------------------|
| ■ Pembrolizumab (n=4) |
| ■ Ipilimumab (n=524)  |

Immunotherapy  
N=528
